# Supplementary material for: Advancing synoptic cancer reports beyond English: the University of Bern/PathoLink approach
Source: Springer Nature journal article supplement (doi:10.1007/s00428-018-2431-0), 2018-08-07
Supplement: MOESM1 [file 16016900]

| English | German |
| --- | --- |
| Synoptic Report (Lung, Resection)  TNM Classification (UICC, 8th Edition, 2017): **pT2b pN2 (2/11) L0 V1 Pn0 G3 R0**  Procedure, Specimen Laterality, Tumor Site: Lobectomy, Right, Upper lobe  Tumor Size (Greatest dimension): 6.4cm  Tumor Focality: Single Tumor  Histologic Type: Invasive adenocarcinoma, micropapillary predominant  Histologic Grade: G3, poorly differentiated  Visceral Pleura Invasion: Present (PL1)  Direct Invasion of Adjacent Structures: No adjacent structures present  *Margins*  Distance of invasive carcinoma from closest margin: 1.2 cm (bronchial):  Bronchial Margin: Uninvolved by invasive carcinoma  Vascular margin: Uninvolved by invasive carcinoma  Parenchymal margin: Uninvolved by invasive carcinoma  Treatment effect: No known presurgical therapy  Lymphatic Vessel Invasion: Not identified  Blood Vessel Invasion: Present  Perineural Invasion: Not identified  *Regional Lymph Nodes*  Number of Lymph Nodes Involved: 2  Nodal Stations Involved: 7, 12  Number of Lymph Nodes Examined:11  Nodal Stations examined: 4, 7, 10, 12  (End of Synoptic Report, CAP Protocol, Version 4.0.0.2) | Synoptischer Bericht (Lunge, Resektion)  TNM-Klassifikation (UICC, 8. Auflage, 2017): **pT2b pN1 (1/11) L0 V1 Pn0 G3 R0**  Art der Resektion, Seite, Tumorlokalisation: Lobektomie, rechts, Oberlappen  Tumordurchmesser: 6,4cm  Anzahl Tumorherde: Singulärer Tumorherd  Histologischer Typ: Adenokarzinom, prädominant mikropapilläres Wachstumsmuster Histologischer Grad: G3, wenig differenziert  Infiltration der Pleura visceralis: vorhanden (PL1)  Direkte Invasion angrenzender Strukturen: Keine angrenzenden Strukturen vorhanden  *Resektatränder*  Minimaler Abstand zum Resektatrand: 1,2cm (bronchial)  Bronchialer Resektatrand: tumorfrei  Vaskulärer Resektatrand: tumorfrei  Parenchym-Resektatrand: tumorfrei  Therapieeffekt: keine bekannte präoperative Therapie  Lymphgefässeinbrüche: nicht nachgewiesen  Blutgefässeinbrüche: vorhanden  Perineuralscheideninfiltration: nicht nachgewiesen  *Regionäre Lymphknoten*  Anzahl befallener Lymphknoten: 2  Befallene Lymphknoten-Stationen: 7, 12  Anzahl untersuchter Lymphknoten: 11  Untersuchte Lymphknoten-Stationen: 4,7,10, 12  (Ende des Synoptischen Berichts, CAP-Protokoll Version 4.0.0.2) |

| English | French |
| --- | --- |
| Synoptic Report (Lung, Resection)  TNM Classification (UICC, 8th Edition, 2017): **pT2b pN2 (2/11) L0 V1 Pn0 G3 R0**  Procedure, Specimen Laterality, Tumor Site: Lobectomy, Right, Upper lobe  Tumor Size (Greatest dimension): 6.4cm  Tumor Focality: Single Tumor  Histologic Type: Invasive adenocarcinoma, micropapillary predominant  Histologic Grade: G3, poorly differentiated  Visceral Pleura Invasion: Present (PL1)  Direct Invasion of Adjacent Structures: No adjacent structures present  *Margins*  Distance of invasive carcinoma from clostest margin: 1.2 cm (bronchial):  Bronchial Margin: Uninvolved by invasive carcinoma  Vascular margin: Uninvolved by invasive carcinoma  Parenchymal margin: Uninvolved by invasive carcinoma  Treatment effect: No known presurgical therapy  Lymphatic Vessel Invasion: Not identified  Blood Vessel Invasion: Present  Perineural Invasion: Not identified  *Regional Lymph Nodes*  Number of Lymph Nodes Involved: 2  Nodal Stations Involved: 7, 12  Number of Lymph Nodes Examined:11  Nodal Stations examined: 4, 7, 10, 12  (End of Synoptic Report, CAP Protocol, Version 4.0.0.2) | Rapport synoptique (Poumon, résection)  Classification TNM (8ème édition de l’UICC, 2017):   **pT2b pN1 (1/7) L0 V1 Pn0 G3 R0**  Type de pièce opératoire, coté, localisation de la tumeur: lobectomie, droit, lobe supérieur  Taille de la tumeur, plus grande dimension: 6,4cm  Nombre de foyers tumoraux: Un seul foyer tumoral  Type histologique: adénocarcinome, type architectural prédominant micro-papillaire  Grade histologique: G3, peu différencié  Infiltration de la plèvre viscérale: présente (PL1)  Invasion directe de structures adjacentes: Aucune structure adjacente n'est présente  *Marges de résection*  Marge minimale de tissu sain: 1,2cm (bronchique)  Tranche de résection bronchique: saine  Tranche de résection vasculaire: saine  Tranche de résection parenchymateuse: saine  Réponse au traitement: Aucune thérapie préchirurgicale connue  Envahissement des vaisseaux lymphatiques: non identifié  Envahissement des vaisseaux sanguins: présent  Engainement périneural: non identifié  *Ganglions lymphatiques régionaux*  Nombre de ganglions lymphatiques envahis: 2  Stations ganglionnaires envahis: 7, 12  Nombre de ganglions lymphatiques examinés  Stations ganglionnaires examinées: 4, 7, 10, 12  (Fin du rapport synoptique, version 4.0.0.2 du protocole du CAP) |
